# Supplementary material for: New Class of Broad-Spectrum Antivirals Improves Influenza Virus Vaccine Development
Source: Research Square preprint supplement (doi:10.21203/rs.3.rs-1193746/v1), 2022-01-20
Supplement: Supplementary file 2 [file 149d66f78ce54344448366b1.docx]

Supplementary Information

**New Class of Broad-Spectrum Antivirals Improves Influenza Virus Vaccine Development**

Armando Pacheco§1, David W. Buchholz§2, I. Abrrey Monreal§2, Shi Xu13,14, Brian Imbiakha2, Julie Sahler2, Mason Jager2, Alex Liqi Lai3, Erik M. Contreras2, Brandan Cook13, Elshan Ralalage8, Qian Liu4, Yao Yu Yeo2, Andrew Ma2, J. Lizbeth Reyes Zamora2, Niraj K. Shil5, Sara Jones-Burrage6, Suzanne M. Pritchard5, Chuntao Yang13, Yu Zhao13, Zeinab J Mohamed7, Cheyan Xu7, Susan Daniel7, Michael J. Jung8, Gerlinde R. Van de Walle2, Suchetana Mukhopadhyay6, Masako Shimamura9, Alan Goodman10, Michele Hardy11, Santanu Bose5, Anthony V. Nicola5, Jack H. Freed3, Avery August2, Jace W. Jones12, Ming Xian13,14, and Hector C. Aguilar2*

§: Authors contributed equally to this manuscript

* To whom correspondence should be addressed, HAC at email: [ha363@cornell.edu](mailto:haguilar@vetmed.wsu.edu)

**
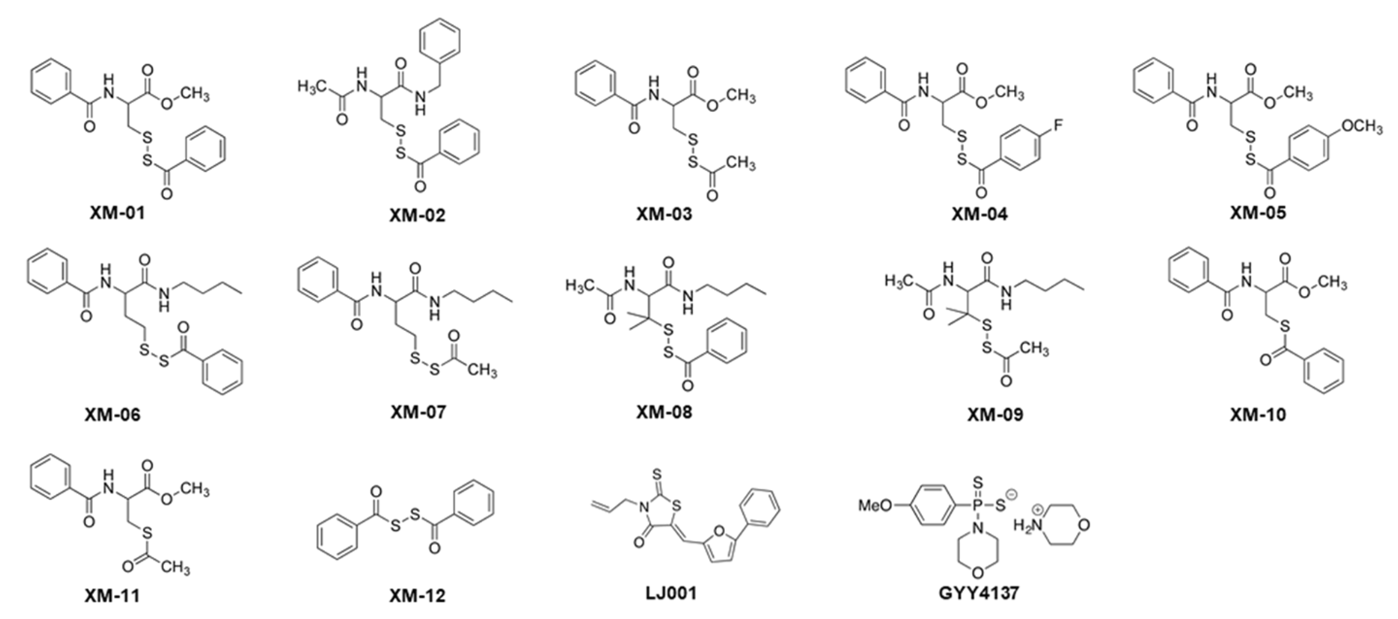
**

**Supplementary Figure 1.** Structures of compounds tested (XM- numbers 01-12) and control compounds LJ001 and GYY4137, known to inhibit enveloped viruses and NiV, respectively.

**
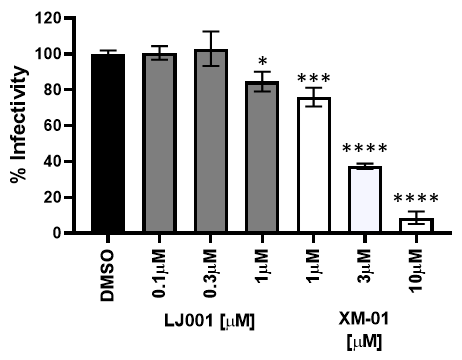
**

**Supplementary Figure 2.** Infection of Vero cells by pNiV pre-treated with XM-01 before infecting Vero cells *in the dark*. While XM-01 did not need light to inhibit viral infections, LJ001 was ineffective without light, as compared to Fig. 1A. N = 3 independent experiments. Statistical analyses were performed with one-ANOVA and Dunnett’s multiple comparisons test (N = 3; *P < 0.05, **P < 0.01, ***P < 0.001, ****P < 0.0001).

**
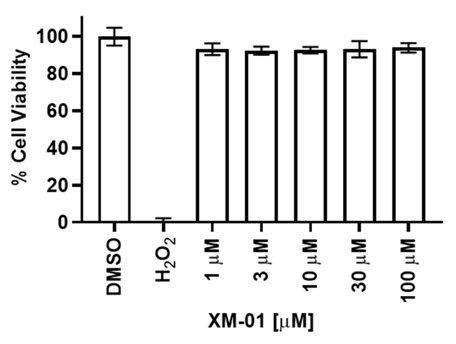
Supplementary Figure 3.** XM-01 effect on cell viability was tested from 1 µM – 100 µM in MDCK cells. No statistical differences were observed at any XM-01 concentration.

**
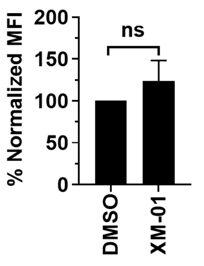
Supplementary Figure 4.** 10 µM XM-01 did not interfere with triggering of the NiV F protein in the fusion cascade. Statistical analyses were performed with a student t-test. N = 3 independent experiments.

**A B**

**
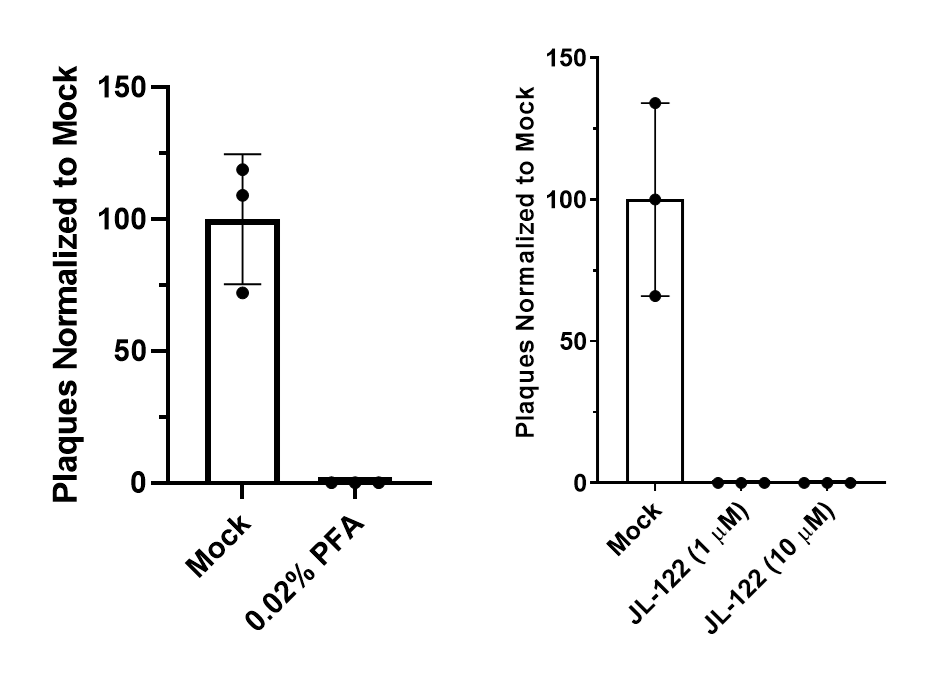
Supplementary Figure 5.** (A) PFA treatment at 0.02% completely inactivated virus as determined through plaque assay. (B) JL-122 treatment at 1 and 10 µM completely inactivated virus as determined through plaque assay. Inactivated virus was attempted to be passaged 3 times in cell culture and in mice, with no virus detected upon after these passages by plaque assay or immunofluorescent staining.

**A B**


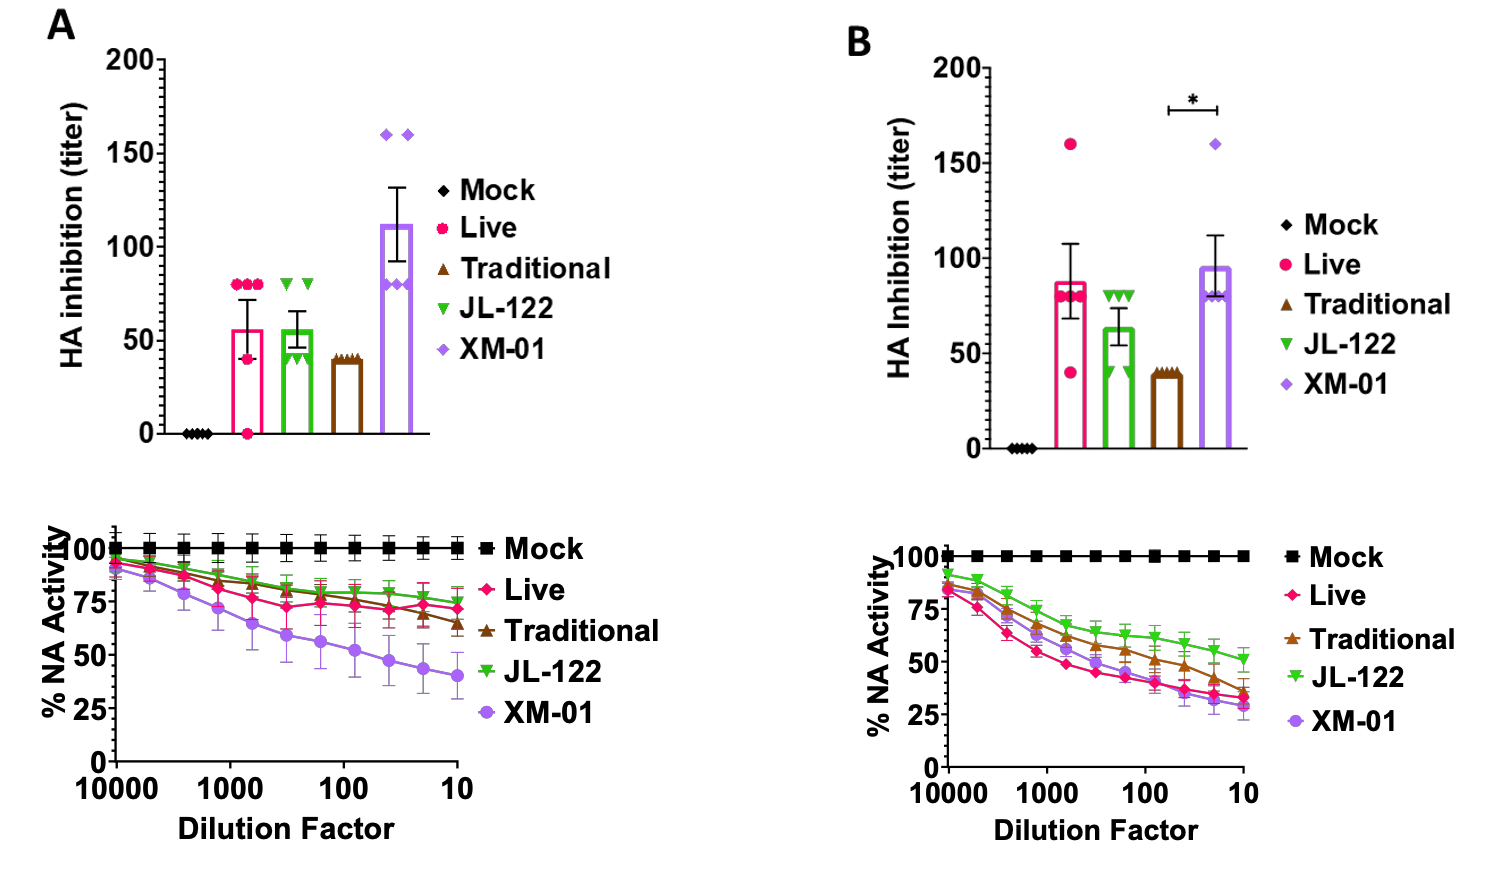


**Supplementary Figure 6.** Hemagglutination and neuraminidase inhibition assays with serum from vaccinated female mice. (A) Female mice serum HA (top) or NA (bottom) inhibition after two vaccinations were statistically significantly different between PFA (traditional) and XM-01 IIV-vaccinated animals for HA (top) and at the 3 highest concentrationos of serum for NA (bottom). (B) Female mice serum HA (top) or NA (bottom) inhibition after three vaccinations. N = 5 females per group. Statistical analyses were performed using standard student t-tests (*p<0.05, **p<0.01, ***p<0.001).
