# Supplementary material for: New Class of Broad-Spectrum Antivirals Improves Influenza Virus Vaccine Development
Source: Research Square preprint supplement (doi:10.21203/rs.3.rs-1193746/v1), 2022-01-20
Supplement: Supplementary file 3 [file e867db443cda8c429beb6bc7.pdf]

## Reporting Summary

Nature Research wishes to improve the reproducibility of the work that we publish. This form provides structure for consistency and transparency in reporting. For further information on Nature Research policies, see our [Editorial Policies](#) and the [Editorial Policy Checklist](#).

### Statistics

For all statistical analyses, confirm that the following items are present in the figure legend, table legend, main text, or Methods section.

n/a Confirmed

- The exact sample size ( $n$ ) for each experimental group/condition, given as a discrete number and unit of measurement
- A statement on whether measurements were taken from distinct samples or whether the same sample was measured repeatedly
- The statistical test(s) used AND whether they are one- or two-sided  
*Only common tests should be described solely by name; describe more complex techniques in the Methods section.*
- A description of all covariates tested
- A description of any assumptions or corrections, such as tests of normality and adjustment for multiple comparisons
- A full description of the statistical parameters including central tendency (e.g. means) or other basic estimates (e.g. regression coefficient) AND variation (e.g. standard deviation) or associated estimates of uncertainty (e.g. confidence intervals)
- For null hypothesis testing, the test statistic (e.g.  $F$ ,  $t$ ,  $r$ ) with confidence intervals, effect sizes, degrees of freedom and  $P$  value noted  
*Give  $P$  values as exact values whenever suitable.*
- For Bayesian analysis, information on the choice of priors and Markov chain Monte Carlo settings
- For hierarchical and complex designs, identification of the appropriate level for tests and full reporting of outcomes
- Estimates of effect sizes (e.g. Cohen's  $d$ , Pearson's  $r$ ), indicating how they were calculated

*Our web collection on [statistics for biologists](#) contains articles on many of the points above.*

### Software and code

Policy information about [availability of computer code](#)

Data collection

Data analysis

For manuscripts utilizing custom algorithms or software that are central to the research but not yet described in published literature, software must be made available to editors and reviewers. We strongly encourage code deposition in a community repository (e.g. GitHub). See the Nature Research [guidelines for submitting code & software](#) for further information.

### Data

Policy information about [availability of data](#)

All manuscripts must include a [data availability statement](#). This statement should provide the following information, where applicable:

- Accession codes, unique identifiers, or web links for publicly available datasets
- A list of figures that have associated raw data
- A description of any restrictions on data availability

No accession codes, unique identifiers, or web links for publicly available datasets apply. All figures show the respective data points, and we have no restrictions in data availability.

## Field-specific reporting

Please select the one below that is the best fit for your research. If you are not sure, read the appropriate sections before making your selection.

- Life sciences       Behavioural & social sciences       Ecological, evolutionary & environmental sciences

For a reference copy of the document with all sections, see [nature.com/documents/nr-reporting-summary-flat.pdf](https://www.nature.com/documents/nr-reporting-summary-flat.pdf)

## Life sciences study design

All studies must disclose on these points even when the disclosure is negative.

|                 |                                                                                                                                                                                                                                                                                                                                                                        |
|-----------------|------------------------------------------------------------------------------------------------------------------------------------------------------------------------------------------------------------------------------------------------------------------------------------------------------------------------------------------------------------------------|
| Sample size     | For in vitro testing, a minimum of 3 independent experiments, each typically with technical replicates, were used. For in vivo testing, a minimum of 10 animals (5 males and 5 females) were used, except for the immunology experiments, in which a minimum of 6 animals were used (3 males and 3 females). These numbers were pre-determined using a power analysis. |
| Data exclusions | No data were excluded from the analysis.                                                                                                                                                                                                                                                                                                                               |
| Replication     | All attempts at replication were successful.                                                                                                                                                                                                                                                                                                                           |
| Randomization   | Allocation of animals for experiments was random, always aged matched for the different groups as much as possible.                                                                                                                                                                                                                                                    |
| Blinding        | Wherever possible, scientist scoring the data were blinded to the sample origins.                                                                                                                                                                                                                                                                                      |

## Reporting for specific materials, systems and methods

We require information from authors about some types of materials, experimental systems and methods used in many studies. Here, indicate whether each material, system or method listed is relevant to your study. If you are not sure if a list item applies to your research, read the appropriate section before selecting a response.

### Materials & experimental systems

### Methods

- |                                     |                                                                 |
|-------------------------------------|-----------------------------------------------------------------|
| n/a                                 | Included in the study                                           |
| <input type="checkbox"/>            | <input checked="" type="checkbox"/> Antibodies                  |
| <input type="checkbox"/>            | <input checked="" type="checkbox"/> Eukaryotic cell lines       |
| <input checked="" type="checkbox"/> | <input type="checkbox"/> Palaeontology and archaeology          |
| <input type="checkbox"/>            | <input checked="" type="checkbox"/> Animals and other organisms |
| <input checked="" type="checkbox"/> | <input type="checkbox"/> Human research participants            |
| <input checked="" type="checkbox"/> | <input type="checkbox"/> Clinical data                          |
| <input checked="" type="checkbox"/> | <input type="checkbox"/> Dual use research of concern           |

- |                                     |                                                    |
|-------------------------------------|----------------------------------------------------|
| n/a                                 | Included in the study                              |
| <input checked="" type="checkbox"/> | <input type="checkbox"/> ChIP-seq                  |
| <input type="checkbox"/>            | <input checked="" type="checkbox"/> Flow cytometry |
| <input checked="" type="checkbox"/> | <input type="checkbox"/> MRI-based neuroimaging    |

## Antibodies

|                 |                                                                                                                                       |
|-----------------|---------------------------------------------------------------------------------------------------------------------------------------|
| Antibodies used | Anti- mouse CD4, anti-mouse CD8, anti-HA tag, anti-FLAG tag, anti-NIV-F, anti-NIV-G, anti-Neuraminidase, etc... antibodies were used. |
| Validation      | All antibodies were validated via multiple studies published by our groups prior to this study                                        |

## Eukaryotic cell lines

Policy information about [cell lines](#)

|                                                                      |                                                                |
|----------------------------------------------------------------------|----------------------------------------------------------------|
| Cell line source(s)                                                  | ATCC                                                           |
| Authentication                                                       | All cell lines were authenticated by ATCC                      |
| Mycoplasma contamination                                             | Mycoplasma contamination was checked and found to be negative. |
| Commonly misidentified lines<br>(See <a href="#">ICLAC</a> register) | None used in this study                                        |

## Animals and other organisms

Policy information about [studies involving animals](#); [ARRIVE guidelines](#) recommended for reporting animal research

|                         |                                                                                             |
|-------------------------|---------------------------------------------------------------------------------------------|
| Laboratory animals      | C57/B6 mice were used for this study, all obtained from and validated by Jackson Immunolabs |
| Wild animals            | The study did not involve wild animals                                                      |
| Field-collected samples | The study did not involve samples collected in the field                                    |
| Ethics oversight        | Cornell and Washington State University IBC and IACUC committees approved this work.        |

Note that full information on the approval of the study protocol must also be provided in the manuscript.

## Flow Cytometry

### Plots

Confirm that:

- The axis labels state the marker and fluorochrome used (e.g. CD4-FITC).
- The axis scales are clearly visible. Include numbers along axes only for bottom left plot of group (a 'group' is an analysis of identical markers).
- All plots are contour plots with outliers or pseudocolor plots.
- A numerical value for number of cells or percentage (with statistics) is provided.

### Methodology

|                           |                                                                                                                                |
|---------------------------|--------------------------------------------------------------------------------------------------------------------------------|
| Sample preparation        | Lung T and B cells were obtained from mice, stained, and fixed post-staining                                                   |
| Instrument                | NXT-Attune                                                                                                                     |
| Software                  | Flow-Jo                                                                                                                        |
| Cell population abundance | % cells was determined from live cell populations.                                                                             |
| Gating strategy           | Gating was performed on live cells only using FSC and SSC parameters. Purity was determined with well characterized antibodies |

- Tick this box to confirm that a figure exemplifying the gating strategy is provided in the Supplementary Information.
